# Supplementary material for: Theratyping cystic fibrosis in vitro in ALI culture and organoid models generated from patient-derived nasal epithelial conditionally reprogrammed stem cells
Source: PubMed Central journal article supplement — Eur Respir J. 2021 Dec 2;58(6):2100908. doi: 10.1183/13993003.00908-2021 (PMC8675295; doi:10.1183/13993003.00908-2021), 2021-12-02
Supplement: ERJ-00908-2021.Shareable.pdf [file ERJ-00908-2021.Shareable.pdf]

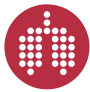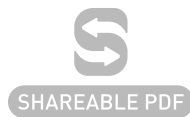

# Therotyping cystic fibrosis *in vitro* in ALI culture and organoid models generated from patient-derived nasal epithelial conditionally reprogrammed stem cells

Giovanni Sette<sup>1,9</sup>, Stefania Lo Cicero<sup>1,9</sup>, Giovanna Blaconà<sup>2</sup>, Silvia Pierandrei<sup>2</sup>, Sabina Maria Bruno<sup>2</sup>,  
Valentina Salvati<sup>1</sup>, Germana Castelli<sup>1</sup>, Mario Falchi<sup>3</sup>, Benedetta Fabrizzi<sup>4</sup>, Giuseppe Cimino<sup>5</sup>,  
Ruggero De Maria<sup>6,7</sup>, Mauro Biffoni<sup>1</sup>, Adriana Eramo<sup>1,10</sup> and Marco Lucarelli<sup>2,8,10</sup>

<sup>1</sup>Dept of Oncology and Molecular Medicine, Istituto Superiore di Sanità, Rome, Italy. <sup>2</sup>Dept of Experimental Medicine, Sapienza University of Rome, Rome, Italy. <sup>3</sup>National AIDS Center, Istituto Superiore di Sanità, Rome, Italy. <sup>4</sup>Cystic Fibrosis Care Center, Mother-Child Dept, United Hospitals, Ancona, Italy. <sup>5</sup>Cystic Fibrosis Reference Center of Lazio Region, AOU Policlinico Umberto I, Rome, Italy. <sup>6</sup>U.O.C. Medical Oncology, Dipartimento di Medicina e Chirurgia Traslazionale, Università Cattolica del Sacro Cuore, Rome, Italy. <sup>7</sup>Fondazione Policlinico Universitario 'A. Gemelli' – IRCCS, Rome, Italy. <sup>8</sup>Pasteur Institute, Cenci Bolognetti Foundation, Sapienza University of Rome, Rome, Italy. <sup>9</sup>Co-first authors. <sup>10</sup>Co-last authors.

Corresponding author: Adriana Eramo ([adriana.eramo@iss.it](mailto:adriana.eramo@iss.it))

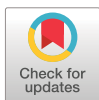

Shareable abstract (@ERSpublications)

**Despite approval of Trikafta, a fraction of cystic fibrosis patients with rare genotypes are still lacking modulator therapies. Conditionally reprogrammed nasal cell-based *in vitro* models may allow therotyping for each patient for personalised treatment.** <https://bit.ly/3yI0J28>

**Cite this article as:** Sette G, Lo Cicero S, Blaconà G, *et al.* Therotyping cystic fibrosis *in vitro* in ALI culture and organoid models generated from patient-derived nasal epithelial conditionally reprogrammed stem cells. *Eur Respir J* 2021; 58: 2100908 [DOI: 10.1183/13993003.00908-2021].

This single-page version can be shared freely online.

Copyright ©The authors 2021.  
For reproduction rights and  
permissions contact  
[permissions@ersnet.org](mailto:permissions@ersnet.org)

This article has supplementary  
material available from  
[erj.ersjournals.com](http://erj.ersjournals.com)

This article has an editorial  
commentary:  
[https://doi.org/10.1183/  
13993003.02735-2021](https://doi.org/10.1183/13993003.02735-2021)

Received: 27 March 2021  
Accepted: 28 July 2021

## Abstract

**Question** Cystic fibrosis (CF) is due to pathogenic variants in the cystic fibrosis transmembrane conductance regulator (CFTR) gene. Recent improvements have enabled pharmacological therapy aiming at restoring mutated CFTR expression and function. CFTR “modulators” have revolutionised the CF therapeutic landscape, particularly the last approved, Trikafta. This drug combination is indicated by the United States Food and Drug Administration and very recently by the European Medicines Agency for genotypes carrying at least one copy of CFTR with the F508del pathogenic variant. However, several genotypes are not yet eligible for Trikafta treatment.

**Materials/patients and methods** We exploited an innovative cellular approach allowing highly efficient *in vitro* expansion of airway epithelial stem cells (AESC) through conditional reprogramming from nasal brushing of CF patients. This approach, coupled to the development of AESC-derived personalised disease models, as organoids and air-liquid interface (ALI) cultures, revealed highly suitable for CFTR pharmacological testing.

**Results and answer to the question** We fully validated the experimental models and implemented the CFTR functional assays and biochemical CFTR protein characterisation, which allowed the evaluation of the efficacy of clinically available modulators in restoring CFTR maturation and function of each patient-derived “avatar” (therotyping). F508del homozygous genotypes, used as controls, confirmed the higher clinical activity of Trikafta in comparison with older modulators. In addition, Trikafta showed its efficacy on three rare genotypes previously not eligible for treatment with modulators, opening the way to clinical translation. Finally, encouraging results for innovative drug combinations were obtained.
